# Supplementary material
Source: PubMed Central journal article supplement (PMC4475358)

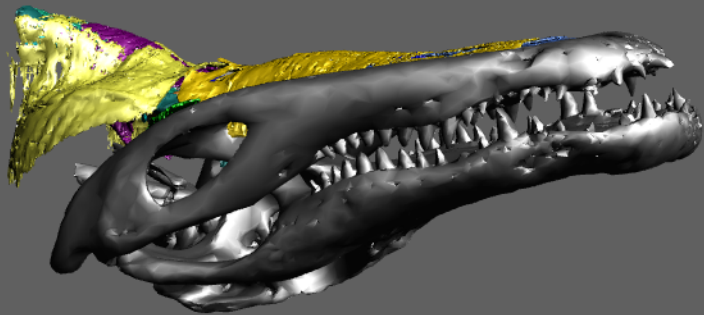

Supplement: joa0227-0045-sd1.pdf [file joa0227-0045-sd1.pdf]
